# Supplementary material for: High performance magnesium-based plastic semiconductors for flexible thermoelectrics
Source: PubMed Central journal article supplement (PMC11178910; doi:10.1038/s41467-024-49440-5), 2024-06-14
Supplement: 41467_2024_49440_MOESM1_ESM.pdf [file 41467_2024_49440_MOESM1_ESM.pdf]

## Supplementary Information

### High performance magnesium-based plastic semiconductors for flexible thermoelectrics

Airan Li<sup>1</sup>, Yuechu Wang<sup>1</sup>, Yuzheng Li<sup>1,2</sup>, Xinlei Yang<sup>1</sup>, Pengfei Nan<sup>3</sup>, Kai Liu<sup>1</sup>, Binghui Ge<sup>3</sup>, Chenguang Fu<sup>1,\*</sup>, Tiejun Zhu<sup>1,2,\*</sup>

<sup>1</sup>State Key Laboratory of Silicon and Advanced Semiconductor Materials, School of Materials Science and Engineering, Zhejiang University, 310058 Hangzhou, China.

<sup>2</sup>Shanxi-Zheda Institute of Advanced Materials and Chemical Engineering, Taiyuan 030000, China. <sup>3</sup>Information Materials and Intelligent Sensing Laboratory of Anhui Province, Key Laboratory of Structure and Functional Regulation of Hybrid Materials

of Ministry of Education, Institutes of Physical Science and Information Technology, Anhui University, Hefei 230601, China. \*Email: [zhutj@zju.edu.cn](mailto:zhutj@zju.edu.cn); [chenguang\\_fu@zju.edu.cn](mailto:chenguang_fu@zju.edu.cn). These authors contributed equally: Airan Li, Yuechu Wang

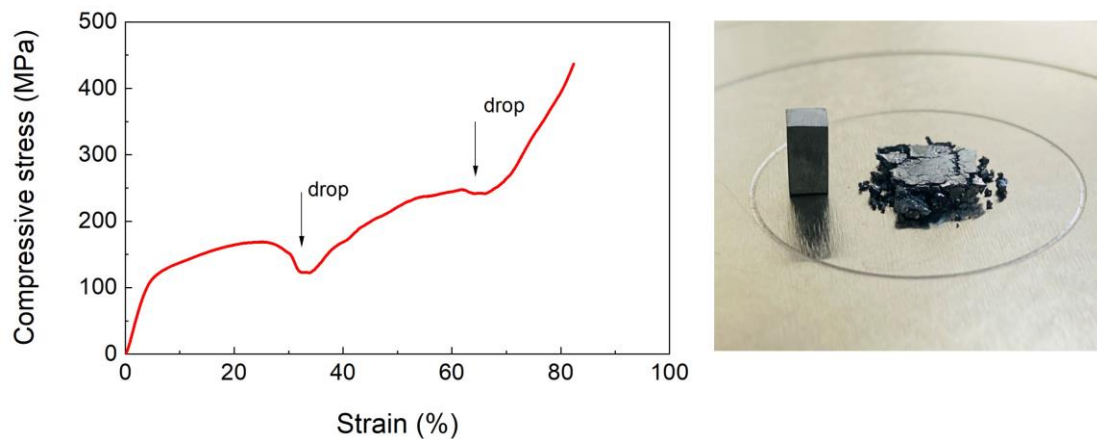

**Supplementary Fig. 1** Compressive strain-stress curve of polycrystalline Mg<sub>3</sub>Bi<sub>2</sub> with its optical image.

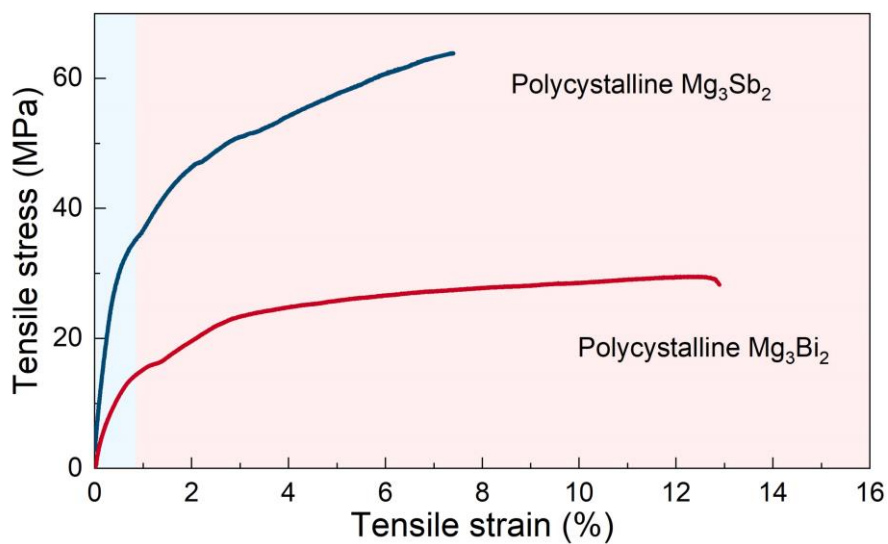

**Supplementary Fig. 2** Tensile strain-stress curves of polycrystalline Mg<sub>3</sub>Sb<sub>2</sub> and Mg<sub>3</sub>Bi<sub>2</sub>.

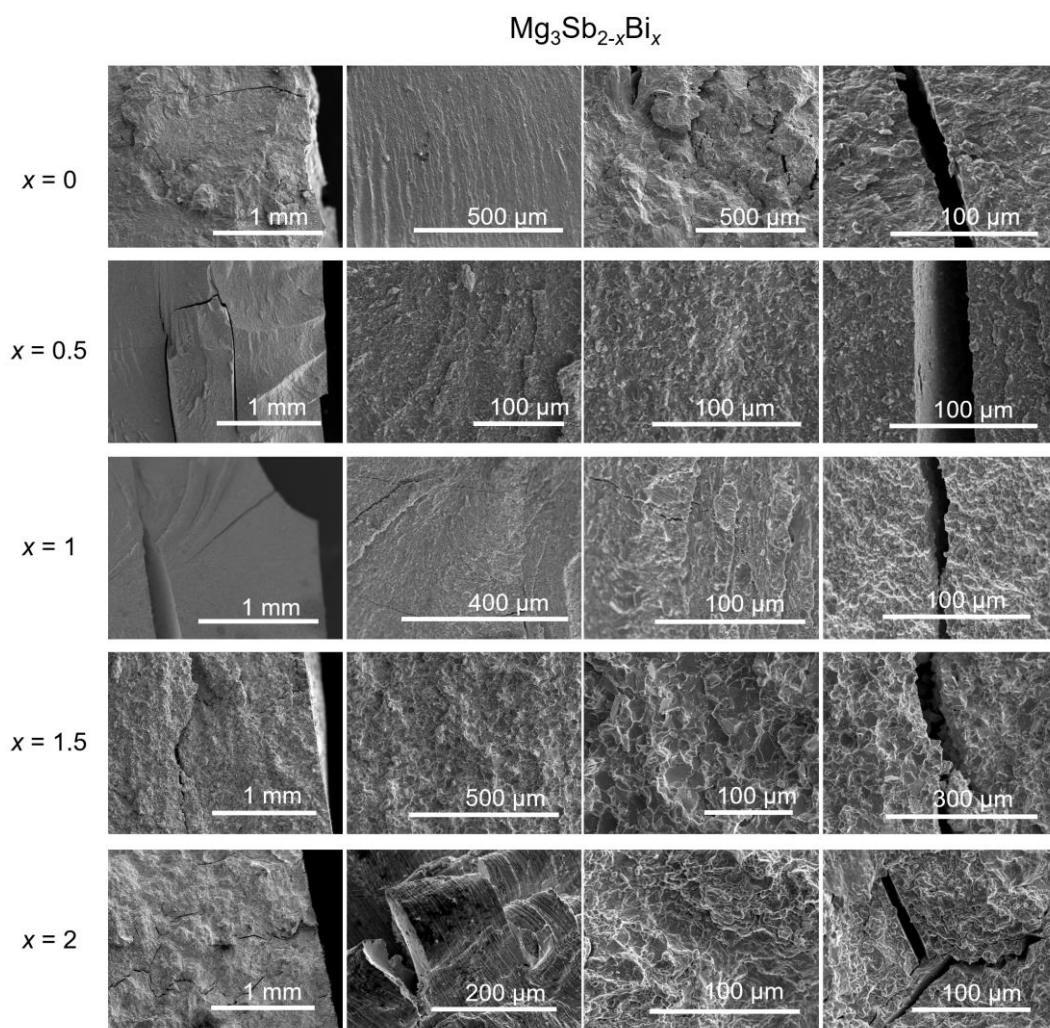

**Supplementary Fig. 3** Fracture surface morphology of polycrystalline Mg<sub>3</sub>Sb<sub>2-x</sub>Bi<sub>x</sub> after compression.

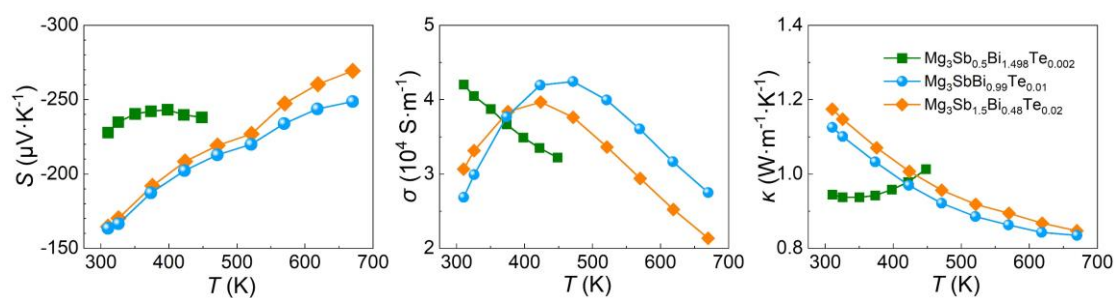

**Supplementary Fig. 4** Temperature dependence of Seebeck coefficient  $S$ , electrical conductivity  $\sigma$  and thermal conductivity  $\kappa$  of polycrystalline Te-doped  $\text{Mg}_3\text{Sb}_{2-x}\text{Bi}_x$ :  $\text{Mg}_3\text{Sb}_{0.5}\text{Bi}_{1.498}\text{Te}_{0.002}$ ,  $\text{Mg}_3\text{SbBi}_{0.99}\text{Te}_{0.01}$ ,  $\text{Mg}_3\text{Sb}_{1.5}\text{Bi}_{0.48}\text{Te}_{0.02}$ .

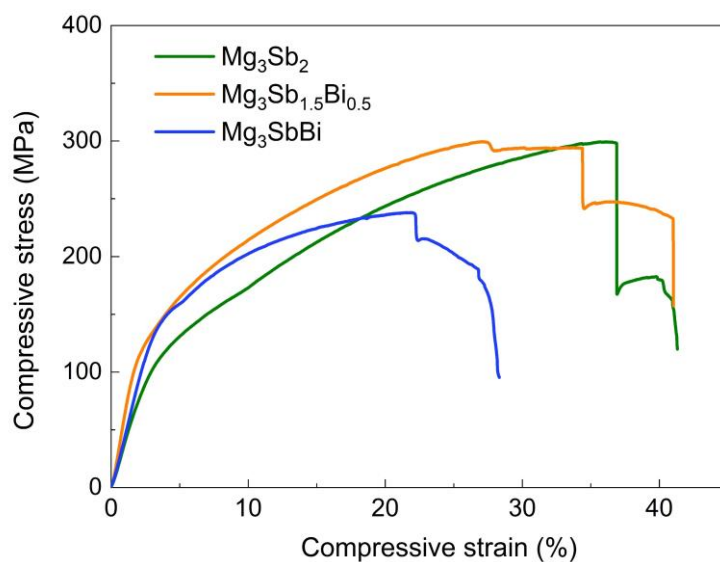

**Supplementary Fig. 5** Compressive strain-stress curve of p-type polycrystalline  $\text{Mg}_3\text{Sb}_2$ ,  $\text{Mg}_3\text{Sb}_{1.5}\text{Bi}_{0.5}$ ,  $\text{Mg}_3\text{SbBi}$  without doping

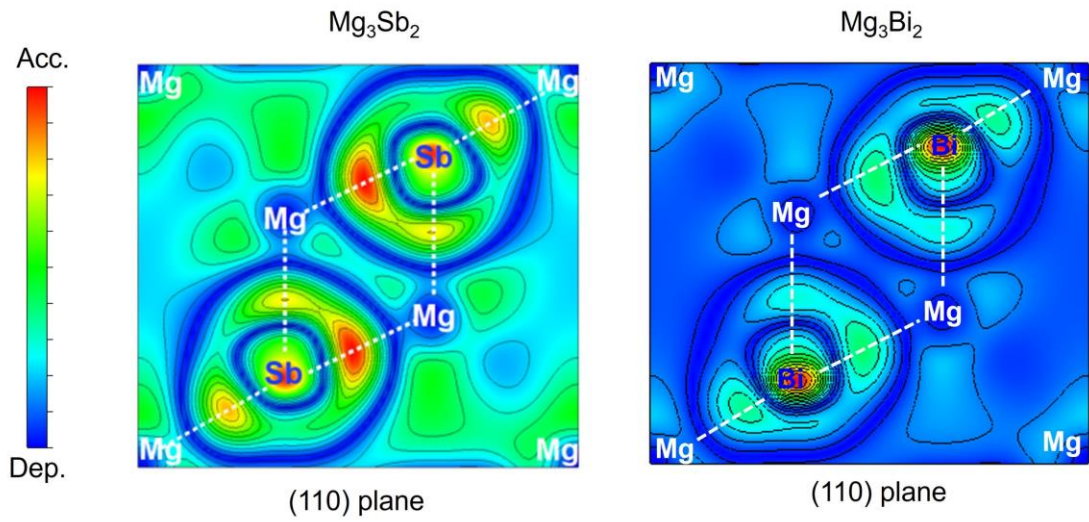

**Supplementary Fig. 6** Charge density differences of  $\text{Mg}_3\text{Sb}_2$  and  $\text{Mg}_3\text{Bi}_2$ . The localized electron accumulation can be found between the Mg and Sb/Bi atoms.

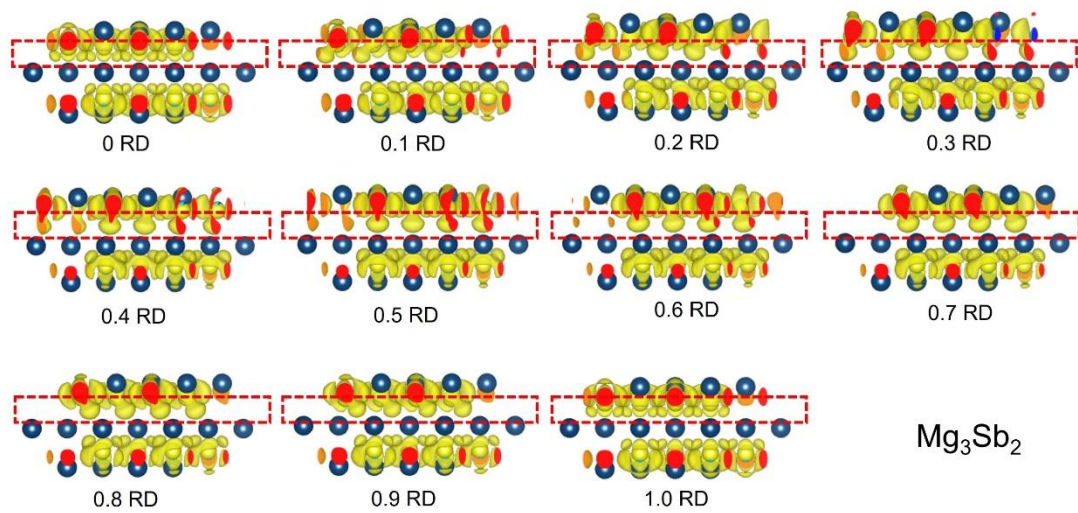

**Supplementary Fig. 7** CDDs of  $\text{Mg}_3\text{Sb}_2$  at different relative displacements (RD) along the  $[100](001)$  slip direction.

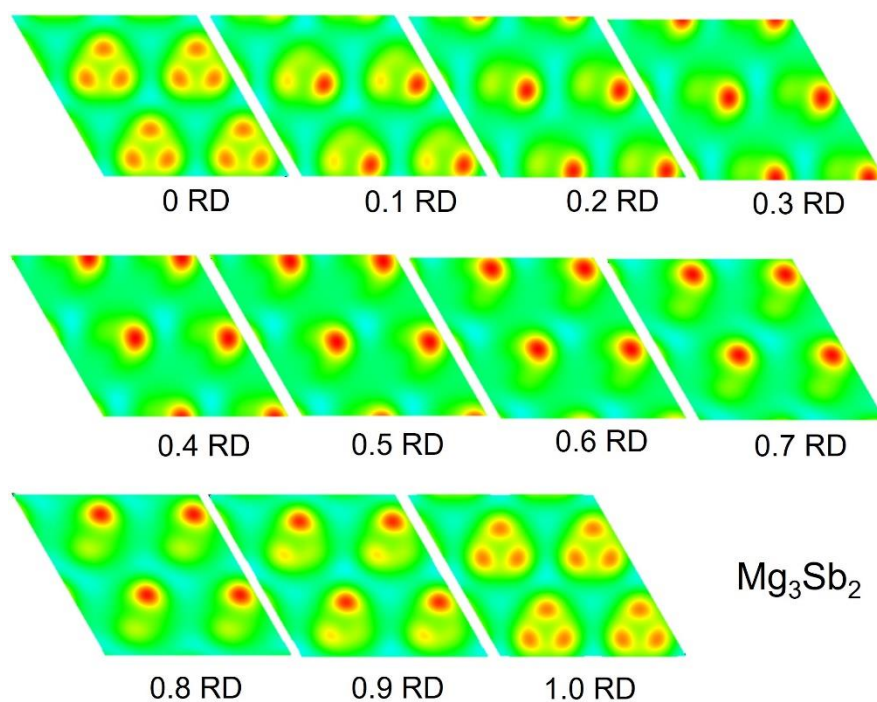

**Supplementary Fig. 8** CDDs projection on (001) plane of  $Mg_3Sb_2$  at different RD along the [100](001) slip direction.

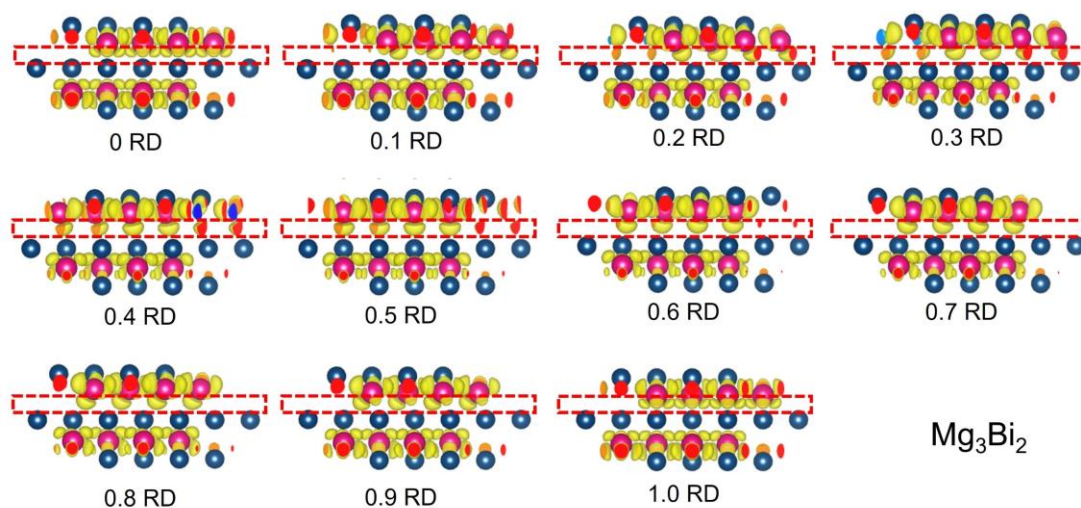

**Supplementary Fig. 9** CDDs of  $Mg_3Bi_2$  at different relative displacements (RD) along the [100](001) slip direction.

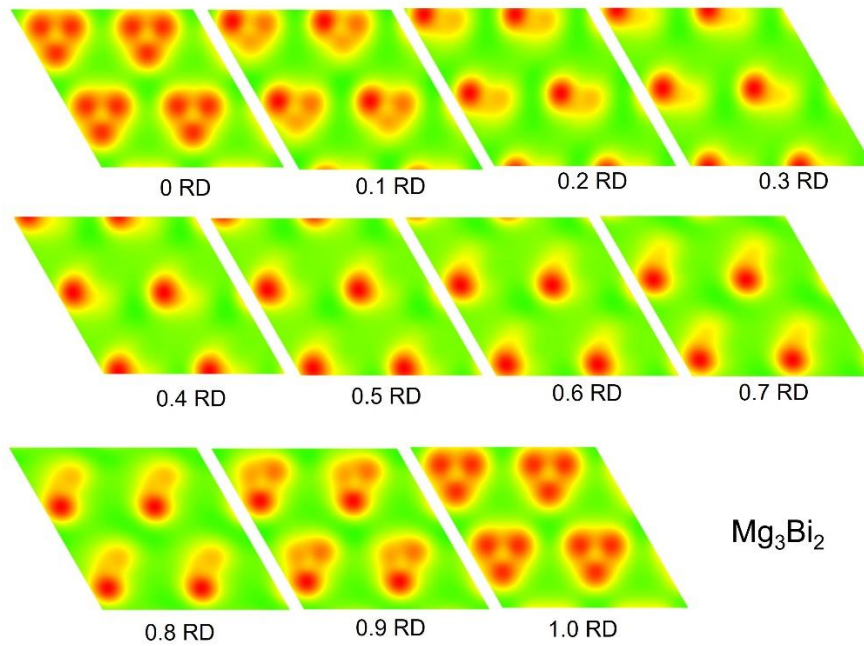

**Supplementary Fig. 10** CDDs projection on (001) plane of  $\text{Mg}_3\text{Bi}_2$  at different RD along the  $[100](001)$  slip direction.

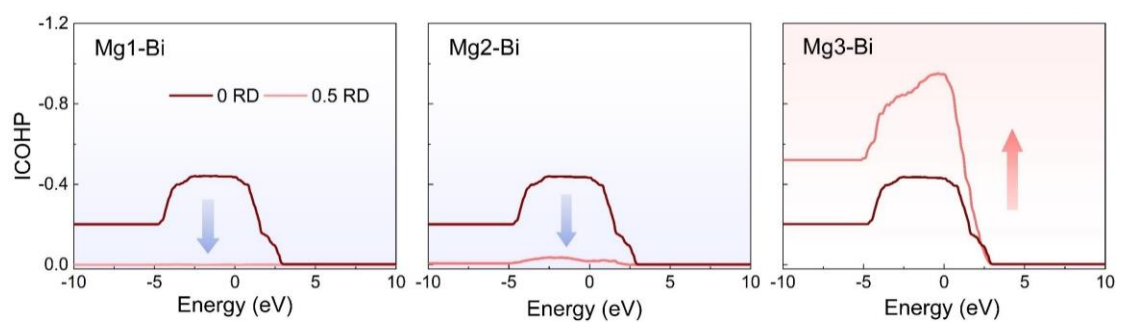

**Supplementary Fig. 11** ICOHPs of Mg1-Bi, Mg2-Bi and Mg3-Bi with RD = 0 and RD = 0.5.

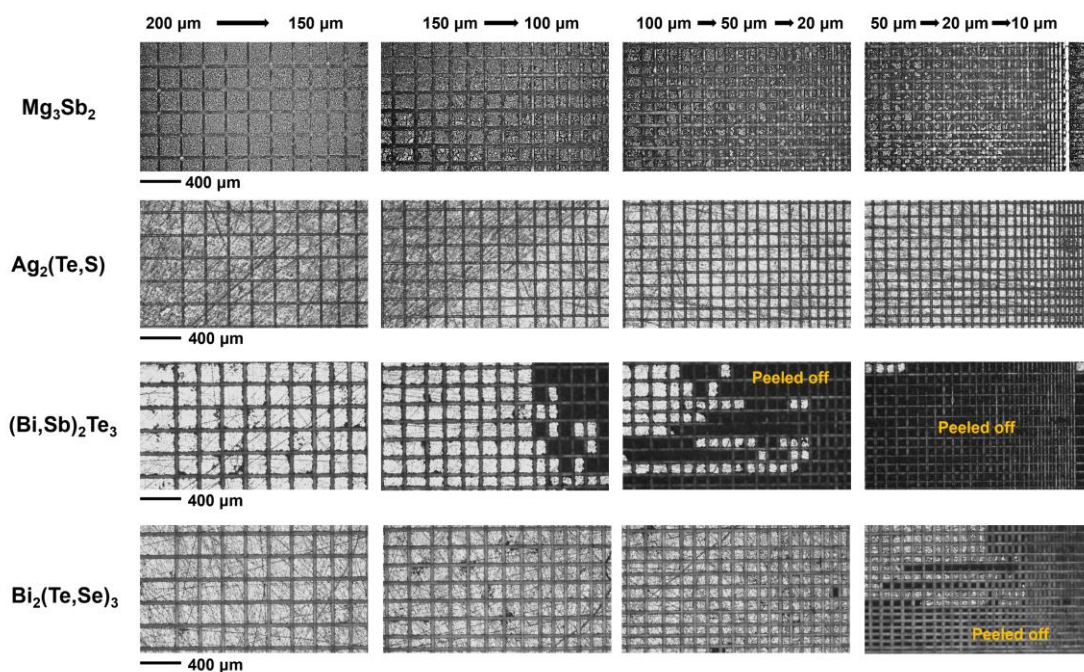

**Supplementary Fig. 12** Dicing images of polycrystalline  $\text{Mg}_3\text{Sb}_2$ ,  $\text{Ag}_2(\text{Te,S})$  and  $(\text{Bi,Sb})_2\text{Te}_3$ , and  $\text{Bi}_2(\text{Te,Se})_3$  with different dimensions.

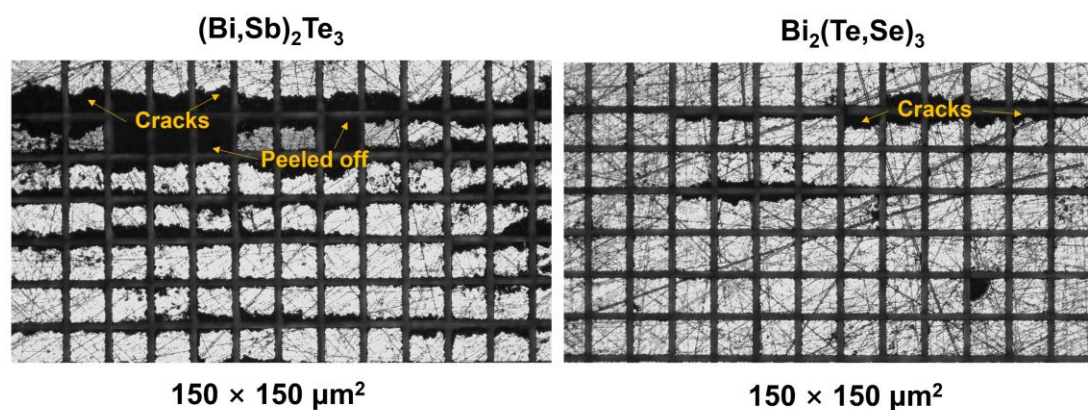

**Supplementary Fig. 13** Dicing images of  $(\text{Bi,Sb})_2\text{Te}_3$  and  $\text{Bi}_2(\text{Te,Se})_3$  with dimension of  $150 \times 150 \mu\text{m}^2$ .

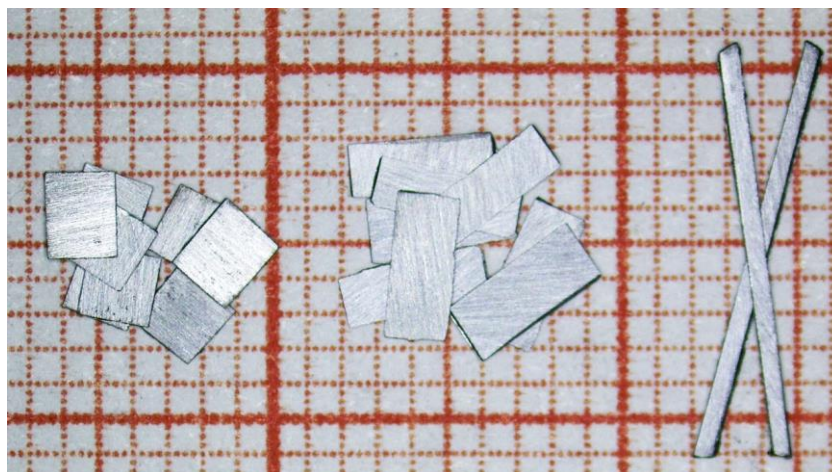

**Supplementary Fig. 14** Different dimensions of polycrystalline  $\text{Mg}_3\text{Sb}_{0.5}\text{Bi}_{1.498}\text{Te}_{0.002}$  by cutting.

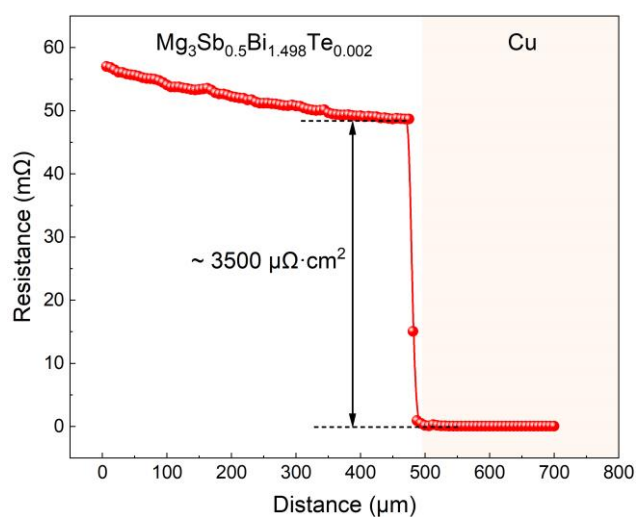

**Supplementary Fig. 15** Contact resistance between  $\text{Mg}_3\text{Sb}_{0.5}\text{Bi}_{1.498}\text{Te}_{0.002}$  and Cu electrode.
